# Supplementary material for: Artificial neural networks reveal individual differences in metacognitive monitoring of memory
Source: PLoS One. 2019 Jul 31;14(7):e0220526. doi: 10.1371/journal.pone.0220526 (PMC6668824; doi:10.1371/journal.pone.0220526)
Supplement: S1 Dataset — (CSV) [file pone.0220526.s005.csv]

PARTICIPANT	Condition	AgeGroup	VocabScore	Health	Vision	Hearing	DSST_SpeedofProcessing	itemHp	itemFAp	itemHR-FAR	itempropcorr	assocHp	assocFAp	assocHR-FAR	asspropcorr	I.PostDict	A.PostDict	I.Strategies	A.Strategies	I.Effort	A.Effort	I.Diff	A.Diff	I.Fatigue	A.Fatigue	I.KeepUpStamina	A.KeepUpStamina	I.SEQavg	A.SEQavg
1	Word	Young		6	10	10		0.95	0.5	0.45	0.725	0.8	0.4	0.4	0.7	74	53	73	39	3	4	4	5	3	4	1	1	67.5	62.5
2	Word	Young	26	7	8	8	50	0.95	0	0.95	0.975	1	0	1	1	83	99	83	98	4	4	2	2	3	3	1	1	53.75	90
3	Word	Young		9	8	7		0.9	0	0.9	0.95	1	0	1	1	100	100	96	100	4	4	3	2	1	1	1	1	91.25	87.5
4	Word	Young		9	9	8		0.95	0	0.95	0.975	1	0.1	0.9	0.95	65	79	74	93	4	5	3	2	2	2	2	2	43.75	77.5
5	Word	Young		10	10	10		0.85	0.05	0.8	0.9	1	0	1	1	58	97	66	100	3	5	4	2	4	2	1	1	40	80
6	Word	Young		8	8	10		0.7	0.35	0.35	0.675	1	0	1	1	85	100	85	92	4	4	3	2	3	2	1	1	65	47.5
7	Word	Young		9	4	8		0.7	0.2	0.5	0.75	0.5	0.1	0.4	0.7	70	50	76	50	4	4	2	3	2	2	1	1	46.25	45
25	Word	Young	23	8	9	10	44	0.7	0.55	0.15	0.575	0.6	0.3	0.3	0.65	58	70	50	73	3	4	4	3	4	4	2	1	82.5	75
36	Word	Young		10	10	10		0.8	0	0.8	0.9	1	0	1	1	59	86	50	86	4	4	3	3	2	1	1	1	43.75	85
37	Word	Young		9	10	10		0.8	0.1	0.7	0.85	1	0.2	0.8	0.9	43	71	31	80	3	5	5	2	5	3	1	1	47.5	57.5
38	Word	Young	23	8	9	8	69	1	0	1	1	1	0	1	1	97	98	96	96	3	3	1	1	1	1	1	1	92.5	97.5
42	Word	Young	21	9	10	9	73	0.9	0.05	0.85	0.925	0.8	0.1	0.7	0.85	67	88	82	89	5	4	4	3	1	1	1	1	33.75	55
43	Word	Young	18	8	9	5	53	1	0.05	0.95	0.975	1	0.2	0.8	0.9	60	46	39	68	4	4	3	3	1	1	1	1	68.75	52.5
44	Word	Young	21	10	10	10	60	0.85	0.15	0.7	0.85	1	0	1	1	72	94	56	94	4	5	4	2	5	2	1	1	40	60
45	Word	Young	20	10	10	9	69	0.9	0.05	0.85	0.925	0.8	0.1	0.7	0.85	44	61	60	58	4	5	5	3	2	2	1	1	27.5	37.5
47	Word	Young	23	8	10	9	58	0.7	0.45	0.25	0.625	0.5	0.4	0.1	0.55	70	19	48	56	4	4	4	4	4	4	2	2	62.5	27.5
48	Word	Young		8	7	9		0.95	0.1	0.85	0.925	0.2	0.5	-0.3	0.35	62	28	57	22	4	3	2	3	3	4	1	1	38.75	52.5
49	Word	Young	27	5	10	8	79	0.8	0.1	0.7	0.85	0.8	0	0.8	0.9	75	75	70	70	3	3	3	3	1	1	1	1	82.5	72.5
8	Name	Young		7	6	6		0.85	0.15	0.7	0.85	0.8	0.3	0.5	0.75	55	27	62	51	3	4	3	4	2	3	1	1	52.5	47.5
9	Name	Young		9	9	9		0.85	0.25	0.6	0.8	0.9	0.4	0.5	0.75	57	42	72	61	4	3	2	4	2	2	2	2	50	65
10	Name	Young		8	10	8		0.75	0.4	0.35	0.675	0.7	0.4	0.3	0.65	31	13	28	29	2	2	4	4	2	2	3	4	30	42.5
20	Name	Young		7	9	9		0.8	0.25	0.55	0.775	0.2	0.4	-0.2	0.4	65	50	40	57	4	4	3	3	5	5	2	2	28.75	72.5
21	Name	Young		9	9	8		0.85	0.2	0.65	0.825	0.6	0.4	0.2	0.6	61	45	55	23	5	5	3	4	4	4	1	1	72.5	65
23	Name	Young	20	8	8	8	72	0.55	0.4	0.15	0.575	0.5	0.2	0.3	0.65	23	16	0	10	3	3	4	4	4	4	3	3	26.25	37.5
24	Name	Young		9	9	10		0.85	0.2	0.65	0.825	0.8	0.3	0.5	0.75	55	48	71	46	3	4	4	5	2	2	1	1	32.5	42.5
27	Name	Young	18	9	9	8	81	0.9	0.2	0.7	0.85	0.9	0.4	0.5	0.75	33	36	1	68	2	4	4	4	3	2	1	1	68.75	57.5
28	Name	Young	23	9	9	9	66	0.95	0	0.95	0.975	1	0	1	1	71	82	81	86	5	5	3	2	2	2	1	1	72.5	92.5
29	Name	Young	29	9	9	9	68	1	0	1	1	0.9	0.1	0.8	0.9	81	75	80	73	5	5	2	3	1	1	1	1	60	80
39	Name	Young	18	7	8	8	73	0.9	0.1	0.8	0.9	0.8	0.1	0.7	0.85	65	82	79	70	3	4	3	4	4	3	1	1	37.5	32.5
40	Name	Young	22	10	9	10	79	0.45	0.05	0.4	0.7	0.8	0.2	0.6	0.8	72	64	32	58	4	4	2	3	2	2	1	1	86.25	85
41	Name	Young						0.65	0.45	0.2	0.6	1	0.2	0.8	0.9	20	72	14	65	4	4	4	2	2	2	1	1	36.25	52.5
50	Name	Young	18	8	10	9	75	0.8	0.15	0.65	0.825	0.7	0.7	0	0.5	76	75	66	72	4	4	5	4	4	4	1	1	22.5	57.5
51	Name	Young		5	6	7		0.9	0.1	0.8	0.9	0.9	0.1	0.8	0.9	74	63	82	91	4	4	3	2	1	1	1	1	42.5	77.5
52	Name	Young	25	10	10	10	59	0.9	0.5	0.4	0.7	0.8	0.7	0.1	0.55	46	77	47	65	4	5	4	4	2	3	3	3	43.75	82.5
55	Name	Young	9	10	9	9	93	0.35	0.3	0.05	0.525	0.9	0.5	0.4	0.7	46	79	41	74	5	5	5	3	4	3	1	1	41.25	65
56	Name	Young	27	9	7	10	77	0.8	0.1	0.7	0.85	0.9	0.1	0.8	0.9	86	83	86	83	5	5	2	2	2	3	1	2	67.5	57.5
62	Name	Young	27	8	9	9	64	0.75	0.3	0.45	0.725	0.4	0.5	-0.1	0.45	65	51	85	35	3	3	3	4	3	3	1	1	50	42.5
63	Name	Young		9	9	9	77	0.9	0.25	0.65	0.825	0.7	0.3	0.4	0.7	86	65	82	50	4	3	3	4	3	3	1	1	55	60
11	NonWord	Young		4	10	10		0.95	0.2	0.75	0.875	0.8	0.4	0.4	0.7	22	5	40	9	4	3	3	5	3	5	1	1	52.5	20
12	NonWord	Young		3	5	4		0.75	0.4	0.35	0.675	0.5	0.5	0	0.5	42	19	60	40	4	3	3	5	3	5	2	2	26.25	57.5
13	NonWord	Young		9	9	9		0.55	0.35	0.2	0.6	0.5	0.6	-0.1	0.45	20	28	45	20	3	2	5	5	3	3	1	1	27.5	37.5
14	NonWord	Young		9	9	8		0.75	0.25	0.5	0.75	0.7	0.5	0.2	0.6	65	54	63	58	3	4	4	4	3	3	1	1	32.5	52.5
15	NonWord	Young	26	9	9	9	77	0.55	0.3	0.25	0.625	0.7	0.4	0.3	0.65	61	49	68	44	4	3	4	4	3	3	2	2	35	72.5
16	NonWord	Young		10	9	9		0.4	0.6	-0.2	0.4	0.5	0.4	0.1	0.55	24	45	31	22	3	3	5	5	4	4	2	2	52.5	80
19	NonWord	Young		10	10	10		0.65	0.05	0.6	0.8	1	0.2	0.8	0.9	80	91	75	60	3	4	3	4	2	3	1	1	80	87.5
32	NonWord	Young	21	10	10	10	68	0.85	0.25	0.6	0.8	0.8	0.2	0.6	0.8	45	28	47	56	4	5	4	4	4	4	1	1	32.5	25
33	NonWord	Young	25	5	7	8	83	0.8	0.15	0.65	0.825	0.6	0.5	0.1	0.55	55	34	73	44	4	4	3	4	3	3	1	2	62.5	60
34	NonWord	Young	17	9	9	9	87	0.7	0.1	0.6	0.8	0.7	0.1	0.6	0.8	45	74	50	63	3	4	5	4	3	3	1	1	37.5	50
35	NonWord	Young	24	10	9	10	83	0.55	0.15	0.4	0.7	0.5	0.4	0.1	0.55	38	65	19	50	3	4	3	2	1	1	2	1	52.5	62.5
46	NonWord	Young		8	9	8		0.75	0.5	0.25	0.625	0.6	0.6	0	0.5	50	41	34	34	3	3	4	5	3	3	1	1	55	65
53	NonWord	Young		9	10	9		0.7	0.5	0.2	0.6	0.7	0.3	0.4	0.7	59	67	44	56	5	4	5	5	4	4	3	2	63.75	57.5
54	NonWord	Young	27	9	9	10	77	0.65	0.35	0.3	0.65	0.8	0.3	0.5	0.75	44	32	4	4	4	3	5	5	4	4	1	1	41.25	65
57	NonWord	Young	20	8	8	10	72	0.45	0.45	0	0.5	0.6	0.5	0.1	0.55	65	54	61	73	4	4	5	5	4	4	2	2	23.75	37.5
58	NonWord	Young	22	8	10	10	66	0.9	0.35	0.55	0.775	0.5	0.6	-0.1	0.45	57	24	31	18	3	3	4	5	4	4	1	1	37.5	55
59	NonWord	Young		9	9	10		0.5	0.25	0.25	0.625	0.8	0.3	0.5	0.75	56	36	69	43	3	3	3	4	2	2	1	1	43.75	25
60	NonWord	Young	20	8	10	10	58	0.65	0.4	0.25	0.625	0.7	0.3	0.4	0.7	54	46	58	20	4	4	5	5	2	2	1	1	35	62.5
61	NonWord	Young		9	10	10		0.55	0.40	0.15	0.575	0.30	0.30	0	0.5	29	14	32	22	3	3	3	3	3	3	2	2	26.25	52.50
123	Word	Old	33	9	8	8	47	0.95	0.05	0.9	0.95	0.9	0.6	0.3	0.65	74	67	71	78	3	4	3	4	1	1	1	1	52.5	67.5
124	Word	Old	32	10	10	9	61	0.75	0	0.75	0.875	1	0	1	1	99	100	100	100	4	5	1	1	1	1	1	1	97.5	97.5
125	Word	Old	28	9	7	9	43	0.9	0.05	0.85	0.925	0.8	0.8	0	0.5	74	74	74	58	2	3	4	4	2	2	2	2	68.75	90
126	Word	Old	34	9	8	9	28	0.75	0.05	0.7	0.85	0.9	0.1	0.8	0.9	69	70	57	86	4	4	4	4	1	1	1	1	23.75	32.5
127	Word	Old	32	8	9	6	28	0.85	0.05	0.8	0.9	0.7	0	0.7	0.85	62	44	55	55	4	4	4	4	2	2	1	1	36.25	25
137	Word	Old	32	9	9	9	53	0.45	0	0.45	0.725	0.9	0.3	0.6	0.8	73	74	81	76	5	5	4	4	1	1	1	1	42.5	92.5
138	Word	Old	31	9	9	9	54	0.75	0.1	0.65	0.825	0.8	0.1	0.7	0.85	57	64	52	54	5	5	5	5	3	3	1	1	38.75	35
139	Word	Old	20	9	7	4	40	0.7	0.4	0.3	0.65	0.8	0.3	0.5	0.75	40	43	38	38	4	4	4	4	4	4	3	3	28.75	55
140	Word	Old	28	9	7	9	58	0.9	0.1	0.8	0.9	1	0.3	0.7	0.85	83	76	75	80	4	5	3	2	1	1	1	1	50	50
141	Word	Old	32	9	8	8	54	0.85	0.05	0.8	0.9	1	0.2	0.8	0.9	82	81	49	49	5	5	3	4	1	1	1	1	61.25	72.5
142	Word	Old	32	8	9	8	56	0.85	0	0.85	0.925	1	0	1	1	98	100	100	100	3	3	1	1	1	1	1	1	62.5	90
149	Word	Old	28	9	8	8	51	0.9	0	0.9	0.95	0.9	0.1	0.8	0.9	73	68	58	60	5	5	3	3	1	1	1	1	66.25	65
150	Word	Old	25	9	8	8	38	0.65	0.1	0.55	0.775	1	0.1	0.9	0.95	64	89	70	76	3	4	4	3	1	1	1	1	56.25	50
152	Word	Old	29	8	8	6	61	0.8	0.25	0.55	0.775	0.9	0.1	0.8	0.9	78	61	70	55	5	5	4	4	1	1	1	1	58.75	50
154	Word	Old	33	8	7	0	72	0.65	0	0.65	0.825	1	0	1	1	82	90	83	90	1	1	1	1	1	1	1	1	33.75	42.5
155	Word	Old	32	8	8	8	66	0.7	0	0.7	0.85	0.9	0	0.9	0.95	49	62	45	31	2	4	4	3	2	2	2	2	30	45
157	Word	Old	35	10	10	10	56	0.7	0.5	0.2	0.6	0.5	0.2	0.3	0.65	14	10	15	6	5	5	4	5	1	2	1	1	16.25	42.5
158	Word	Old	30	8	8	9	50	0.85	0.05	0.8	0.9	1	0.3	0.7	0.85	69	44	45	25	4	4	3	4	1	1	1	1	45	50
120	Name	Old	26	4	5	5	43	0.75	0.1	0.65	0.825	0.5	0.2	0.3	0.65	64	28	0	0	3	3	4	5	3	3	3	3	21.25	27.5
121	Name	Old	30	10	9	6	55	0.65	0.25	0.4	0.7	0.8	0.2	0.6	0.8	44	45	66	15	5	5	5	5	3	3	1	1	65	37.5
122	Name	Old	31	9	6	4	57	0.75	0.05	0.7	0.85	0.8	0.2	0.6	0.8	61	29	61	32	4	4	4	5	3	4	1	2	60	40
129	Name	Old	31	10	10	6	49	0.35	0.15	0.2	0.6	0.7	0.3	0.4	0.7	17	39	27	26	4	4	5	5	2	2	1	1	11.25	20
130	Name	Old	30	10	10	10	52	0.8	0.65	0.15	0.575	0.6	0.6	0	0.5	66	68	45	45	5	5	3	3	1	1	1	1	38.75	65
133	Name	Old	32	8	10	6	52	0.65	0.25	0.4	0.7	0.9	0.4	0.5	0.75	50	50	40	40	4	4	4	5	3	3	1	1	30	45
134	Name	Old	20	10	9	10	63	0.8	0.25	0.55	0.775	0.8	0.6	0.2	0.6	56	35	50	23	5	5	5	5	1	1	1	1	25	35
135	Name	Old	25	8	8	5	69	0.75	0	0.75	0.875	1	0.5	0.5	0.75	68	19	63	7	4	4	4	5	1	2	1	4	20	17.5
136	Name	Old	5	9	7	8	41	0.6	0.45	0.15	0.575	0.6	0.4	0.2	0.6	41	57	44	56	5	5	3	3	2	2	2	2	12.5	50
145	Name	Old	34	8	9	7	49	0.55	0.25	0.3	0.65	0.7	0.4	0.3	0.65	67	35	42	42	5	5	3	5	1	1	1	1	20	30
146	Name	Old	31	5	6	6	30	0.5	0.3	0.2	0.6	0.8	0.4	0.4	0.7	45	40	10	11	4	3	3	5	3	5	3	5	11.25	27.5
147	Name	Old	33	8	9	9	59	0.4	0	0.4	0.7	0.6	0.2	0.4	0.7	33	35	15	17	5	5	5	5	3	3	1	1	12.5	45
148	Name	Old	27	8	10	7	45	0.6	0.35	0.25	0.625	0.5	0.6	-0.1	0.45	44	37	21	19	4	4	5	5	3	3	1	1	18.75	40
151	Name	Old	27	10	10	9	36	0.55	0.4	0.15	0.575	0.3	0.5	-0.2	0.4	19	19	22	22	3	3	5	5	1	1	2	2	21.25	40
159	Name	Old	28	10	9	10	40	0.6	0.35	0.25	0.625	1	0.3	0.7	0.85	50	50	50	50	4	4	5	5	1	1	1	1	75	75
160	Name	Old	25	8	10	10	38	0.25	0.05	0.2	0.6	0.5	0.4	0.1	0.55	42	64	35	64	4	4	5	3	5	4	1	1	11.25	17.5
101	NonWord	Old	26	10	10	6	39	0.5	0.2	0.3	0.65	0.6	0.3	0.3	0.65	41	52	34	30	5	5	4	4	1	1	1	1	32.5	55
102	NonWord	Old	30	7	8	8	43	0.8	0.35	0.45	0.725	0.4	0.3	0.1	0.55	62	24	5	1	3	5	3	5	3	5	1	1	52.5	57.5
104	NonWord	Old	32	8	10	0	49	0.7	0.25	0.45	0.725	0.8	0.3	0.5	0.75	78	63	70	34	5	5	4	5	1	2	1	1	90	85
105	NonWord	Old	30	10	9	3	41	0.9	0.5	0.4	0.7	0.9	0.7	0.2	0.6	16	3	0	1	4	4	4	5	2	2	1	1	3.75	0
106	NonWord	Old	32	8	10	9	36	0.75	0.4	0.35	0.675	0.9	0.3	0.6	0.8	80	51	50	49	4	5	2	4	1	1	1	1	32.5	55
108	NonWord	Old	28	8	9	9	54	0.45	0.15	0.3	0.65	0.5	0.3	0.2	0.6	15	14	9	8	3	3	4	4	1	1	1	1	15	20
109	NonWord	Old	25	8	7	10	39	0.65	0.35	0.3	0.65	0.9	0.7	0.2	0.6	73	69	57	55	3	3	3	3	2	2	1	1	30	60
110	NonWord	Old	30	5	9	7	49	0.75	0.15	0.6	0.8	0.6	0.3	0.3	0.65	55	12	30	0	4	4	3	3	3	3	1	2	52.5	20
114	NonWord	Old	31	10	10	6	53	0.7	0.25	0.45	0.725	0.8	0.2	0.6	0.8	27	45	14	22	5	5	5	5	3	3	2	2	31.25	42.5
115	NonWord	Old	31	8	8	7	50	0.5	0.3	0.2	0.6	0.7	0.7	0	0.5	77	67	76	61	5	4	4	5	4	5	1	1	40	75
116	NonWord	Old	31	10	7	10	52	0.75	0.3	0.45	0.725	0.7	0.2	0.5	0.75	68	67	50	48	3	3	5	5	1	1	1	1	55	60
117	NonWord	Old	20	9	9	10	47	0.45	0.6	-0.15	0.425	0.7	0.1	0.6	0.8	18	16	23	25	3	3	5	5	2	2	1	1	16.25	10
118	NonWord	Old	32	10	10	6	47	0.7	0.3	0.4	0.7	0.7	0.3	0.4	0.7	55	44	3	0	5	5	2	4	1	1	1	1	16.25	37.5
119	NonWord	Old	32	9	8	4	35	0.35	0	0.35	0.675	0.3	0	0.3	0.65	57	58	44	59	4	4	4	3	4	3	1	1	10	40
153	NonWord	Old	33	10	10	8	61	0.7	0.05	0.65	0.825	0.9	0.2	0.7	0.85	70	53	69	58	5	5	2	4	1	3	1	2	86.25	87.5
